# Supplementary material
Source: MDPI journal article supplement (https://www.mdpi.com/2079-6412/10/2/111)

## Supplementary Materials:

# A Novel Simple Anti-Ice Aluminum Coating: Synthesis and In-Lab Comparison with a Superhydrophobic Hierarchical Surface

Marcella Balordi <sup>1,\*</sup>, Giorgio Santucci de Magistris <sup>1,2</sup> and Cristina Chemelli <sup>3</sup>

<sup>1</sup> RSE, Ricerca sul Sistema Energetico, Strada Torre della Razza, 29122 Piacenza, Italy; giorgio.santucci@rse-web.it

<sup>2</sup> Facoltà di Scienze Chimiche, Università Degli Studi di Pavia, viale Taramelli 12, 27100 Pavia, Italy

<sup>3</sup> RSE, Ricerca sul Sistema Energetico, via Rubattino 54, 20134 Milano, Italy; cristina.chemelli@rse-web.it

\* Correspondence: marcella.balordi@rse-web.it

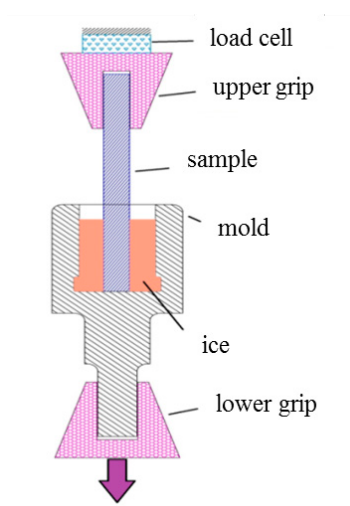

**Figure S1.** Home-made equipment for shear stress measures.

**Table S1.** Protocol for shear stress measures.

| Protocol for Shear Stress Measures |                                                                                                          |
|------------------------------------|----------------------------------------------------------------------------------------------------------|
| Step 1                             | Fill-up the mold with 40 ml of deionized water                                                           |
| Step 2                             | Insert the sample bar into the mold                                                                      |
| Step 3                             | Freeze the mold and the sample at $-19\text{ }^{\circ}\text{C}$ for at least 8 hours                     |
| Step 4                             | Fix the mold into the machine                                                                            |
| Step 5                             | Extract the bar from the ice at a speed of 4 mm/min                                                      |
| Step 6                             | Calculate the ice adhesion strength $\tau = FA$<br>where A is the sample surface in contact with the ice |

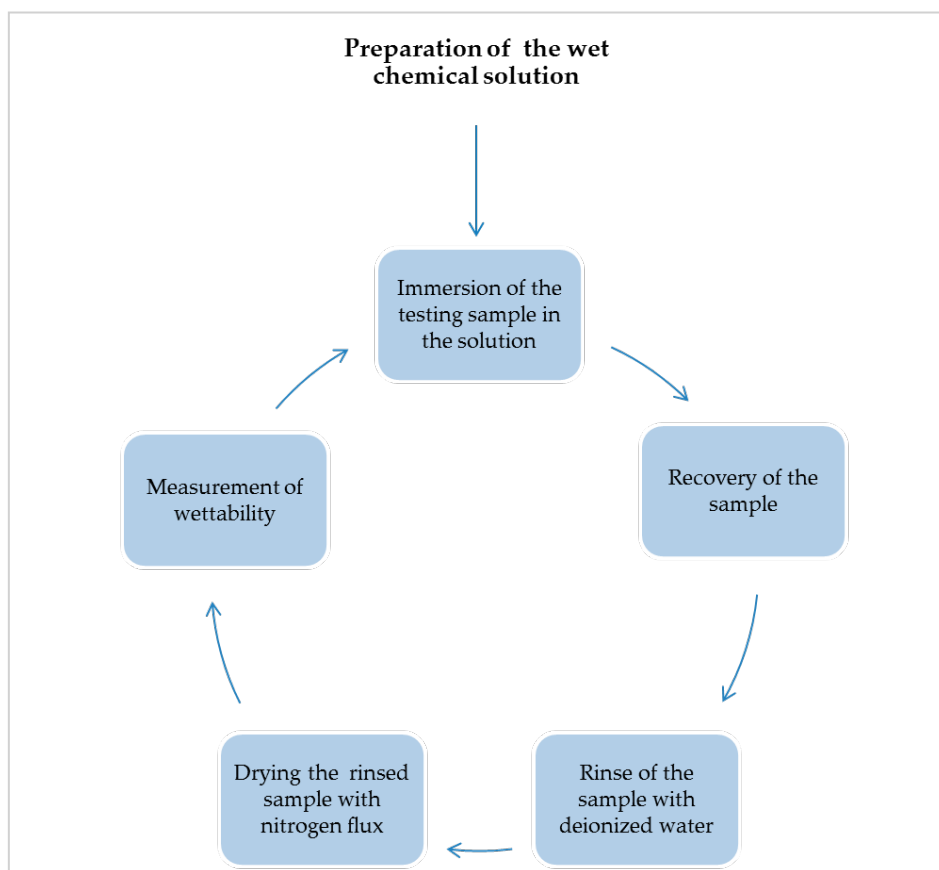

**Figure S2.** Sample treatment protocol for the durability testing in wet chemicals.

**Table S2.** Schedule of the wettability measures after the immersion in wet chemicals.

| Time of Immersion | Acid Solution | Saline Solution | Basic Solution |
|-------------------|---------------|-----------------|----------------|
| 0 hour            | ✓             | ✓               | ✓              |
| 2 hours           |               |                 | ✓              |
| 8 hours           |               |                 | ✓              |
| 16 hours          |               |                 | ✓              |
| 1 day             | ✓             | ✓               | ✓              |
| 2 days            | ✓             | ✓               |                |
| 3 days            | ✓             | ✓               |                |
| 7 days            | ✓             | ✓               |                |
| 10 days           | ✓             | ✓               |                |
| 15 days           | ✓             | ✓               |                |
| 20 days           | ✓             | ✓               |                |
| 30 days           | ✓             | ✓               |                |
| 50 days           | ✓             | ✓               |                |
| 60 days           | ✓             | ✓               |                |

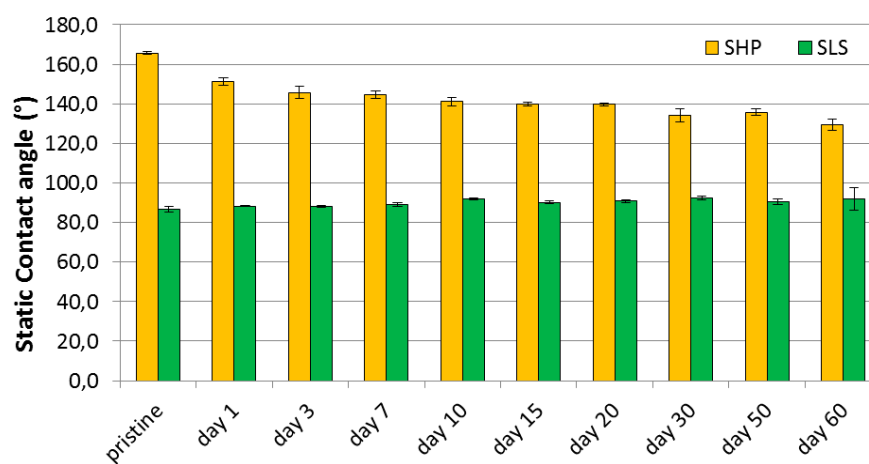

Figure S3. Durability in acid solution: Static Water Contact Angles.

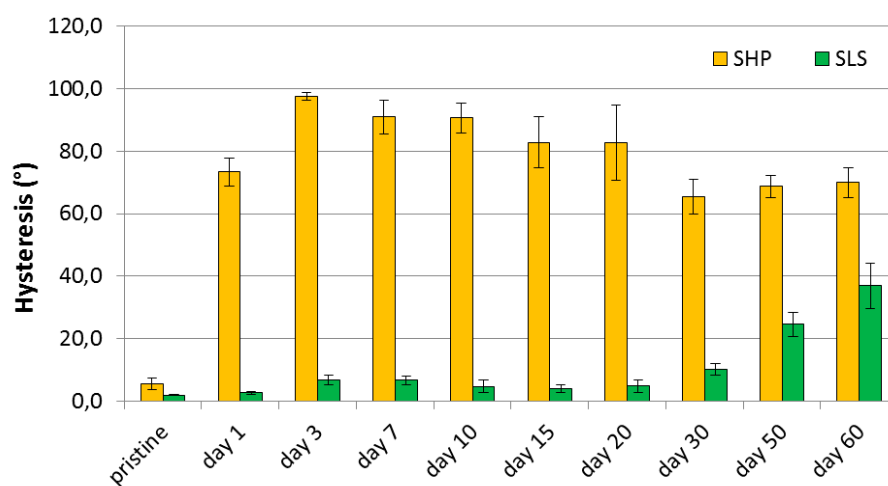

Figure S4. Durability in acid solution: Hysteresis.

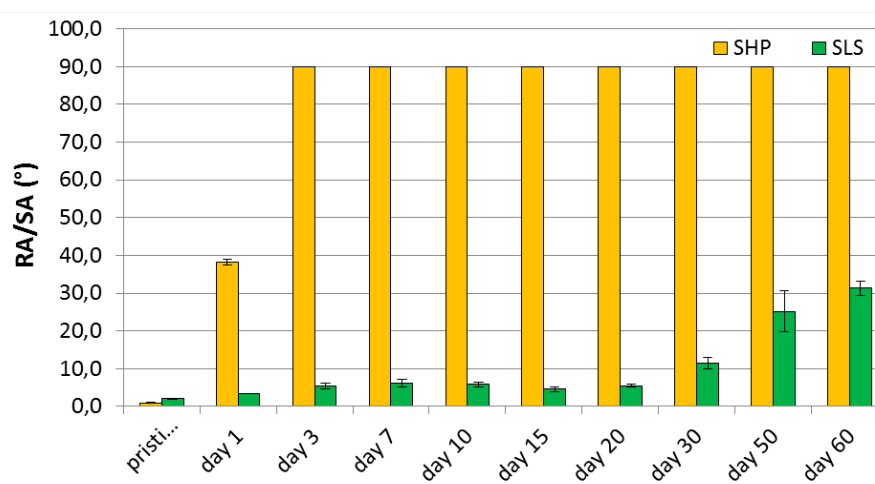

Figure S5. Durability in acid solution: Roll-off/Sliding angles.

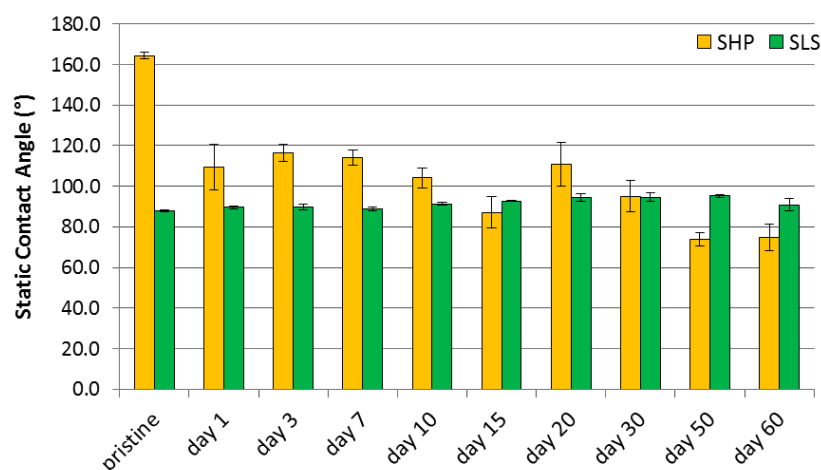

**Figure S6.** Durability in saline solution: Static Water Contact Angles.

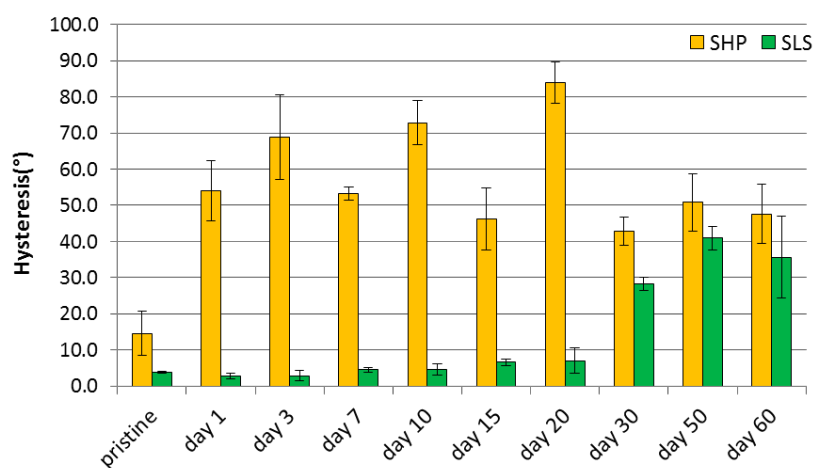

**Figure S7.** Durability in saline solution: Hysteresis.

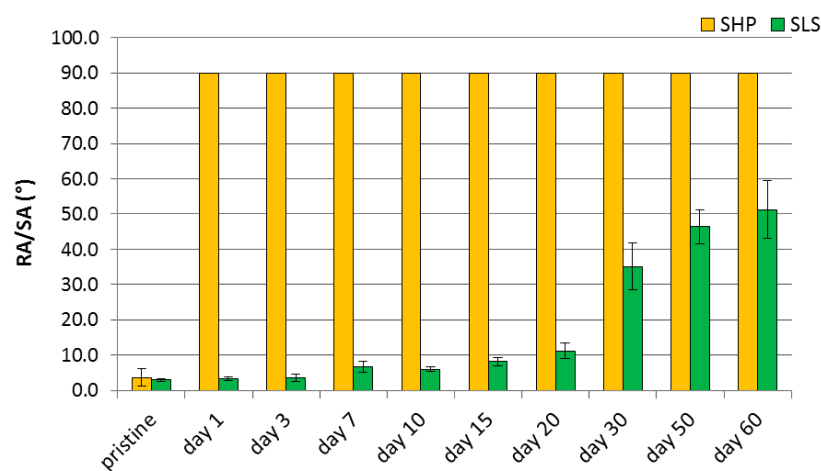

**Figure S8.** Durability in saline solution: Roll-off/Sliding angles.

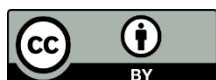

Supplement: s1 [file s1]
